# Supplementary material for: Neonatal DNA methylation profile in human twins is specified by a complex interplay between intrauterine environmental and genetic factors, subject to tissue-specific influence
Source: HighWire-hosted journal article supplement (doi:10.1101/gr.136598.111), 2012-07-16
Supplement: SuppFigureLegends.docx [file SuppFigureLegends.docx]

Supplementary figure legends

Figure S1. Unsupervised clustering of CBMC samples. All samples were clustered solely on similarities in DNA methylation profile. Zygosity and gender are indicated as are twin pairs that cluster together.

Figure S2. Unsupervised clustering of HUVEC samples. All samples were clustered solely on similarities in DNA methylation profile. Zygosity and gender are indicated as are twin pairs that cluster together.

Figure S3. Unsupervised clustering of placental samples. All samples were clustered solely on similarities in DNA methylation profile. Zygosity and gender are indicated as are twin pairs that cluster together.

Figure S4. Range of within-pair methylation discordance for three tissues from all twin pairs. Box-and whisker plots, with MZ pairs shaded in grey, DZ pairs in white.

Figure S5. Cross-platform validation of absolute DNA methylation levels in HUVECs and placenta. Infinium methylation β-values are plotted against Sequenom EpiTYPER methylation values for corresponding CpG units for two CpGs ranked highly for correlation with birth weight. Gene name, Infinium probe ID and corresponding EpiTYPER CpG unit are shown for each CpG site validated.

Figure S6. Within-pair methylation discordance vs within-pair birth weight discordance for *APOLD1* in HUVECS from MZ pairs. Within-pair methylation discordance (twin 1 – twin 2) vs within-pair birth weight discordance (twin 1 – twin 2) for Infinium probes cg02813863 and cg26244225, EpiTYPER CpG 5_6 and EpiTYPER assay mean.

Figure S7. Within-pair methylation discordance vs within-pair birth weight discordance for *CBLN1* in placenta from MZ pairs. Within-pair methylation discordance (twin 1 – twin 2) vs within-pair birth weight discordance (twin 1 – twin 2) for Infinium probe cg15869642, EpiTYPER CpG 2 and EpiTYPER assay mean.

Figure S8. Within-pair methylation discordance vs within-pair birth weight discordance for *ZNF606* in placenta from MZ pairs. Within-pair methylation discordance (twin 1 – twin 2) vs within-pair birth weight discordance (twin 1 – twin 2) for Infinium probe cg12259537, EpiTYPER CpG 5_6 and EpiTYPER assay mean.
